# Supplementary material
Source: PubMed Central journal article supplement (PMC4806215)
Supplement: mmc1.pdf [file mmc1.pdf]

## SUPPORTING MATERIAL

---

### Cholesterol-enriched microdomain formation induced by viral-encoded, membrane active amphipathic peptide

Joshua M. Hanson<sup>1,§</sup>, Douglas L. Gettel<sup>2,§</sup>, Seyed R. Tabaei<sup>3,4</sup>, Joshua Jackman<sup>3,4</sup>, Min Chul Kim<sup>3,4</sup>, Darryl Y. Sasaki<sup>5</sup>, Jay T. Groves<sup>6</sup>, Bo Liedberg<sup>3,4</sup>, Nam-Joon Cho<sup>\*3,4,7</sup>, and Atul N. Parikh<sup>\*1,2,3,4,8</sup>

<sup>1</sup>Biophysics Graduate Group, University of California, Davis, California 95616 USA

<sup>2</sup>Department of Chemical Engineering & Materials Science, University of California, Davis, California 95616 USA

<sup>3</sup>Centre for Biomimetic Sensor Science, Nanyang Technological University, 50 Nanyang Drive 637553, Singapore

<sup>4</sup>School of Materials Science and Engineering, Nanyang Technological University, 50 Nanyang Ave 637459, Singapore

<sup>5</sup>Biotechnology and Bioengineering Dept., Sandia National Laboratories, Livermore, California 94551 USA

<sup>6</sup>Chemistry Department, University of California, Berkeley, California 94720 USA and Mechanobiology Institute, National University of Singapore, Singapore 117411

<sup>7</sup>School of Chemical and Biomedical Engineering, Nanyang Technological University, 62 Nanyang Drive 637459, Singapore

<sup>8</sup>Department of Biomedical Engineering, University of California, Davis, California 95616 USA

§ J.M.H. and D.L.G. contributed equally.

#### Correspondence:

Atul N. Parikh, Departments of Biomedical Engineering and Chemical Engineering & Materials Science, University of California, Davis, California 95616 USA, Phone: +1 (530) 304-7523, [anparikh@ucdavis.edu](mailto:anparikh@ucdavis.edu)

**Keywords:** antiviral mechanisms | viral replication mechanisms | membrane-peptide interactions | giant lipid vesicles | phase separation

## SUPPORTING FIGURES & LEGENDS

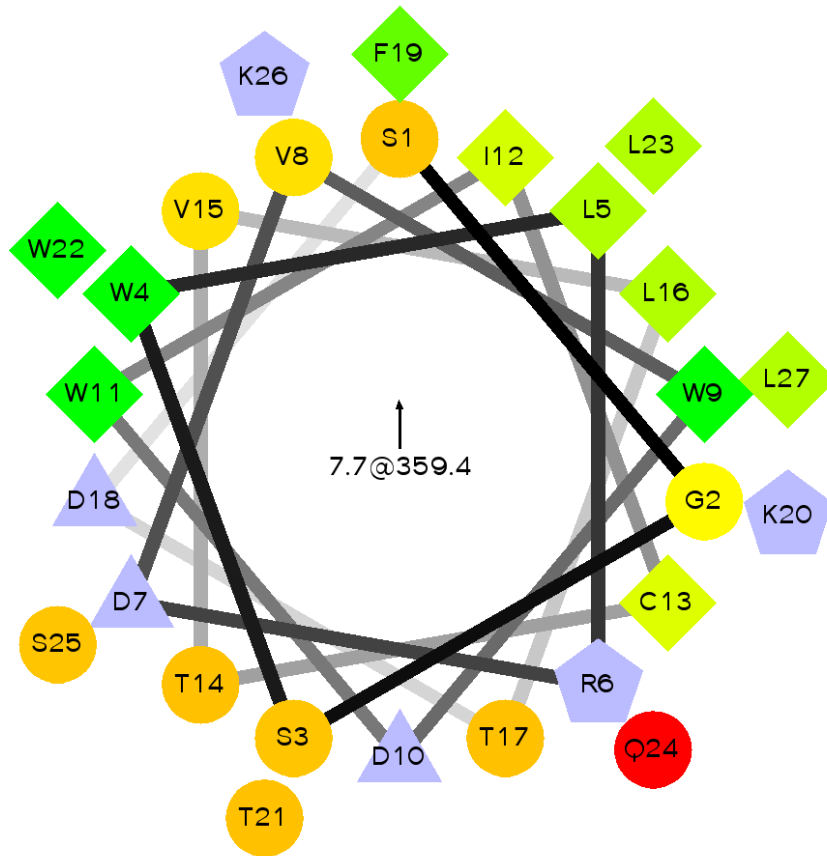

**Fig. S1. Helical Wheel Projection of AH Peptide.** AH Peptide sequence of amino acids: SGSWLRDVWDWICTVLTFDKTWLQSKL. A helical wheel projection showing hydrophilic residues (circles), hydrophobic residues (diamonds), potentially negatively charged residues (triangles), and potentially positively charged residues (pentagons). Hydrophobicity is color coded: most hydrophobic residue (green), with amount of green decreasing proportionally to the hydrophobicity; zero hydrophobicity (yellow); hydrophilic residues (red); and potentially charged residues (light blue). Projection was produced using a program from <http://rzlab.ucr.edu> created by [Don Armstrong](#) and Raphael Zidovetzki. Version: Id: wheel.pl,v 1.4 2009-10-20 21:23:36 don Exp.

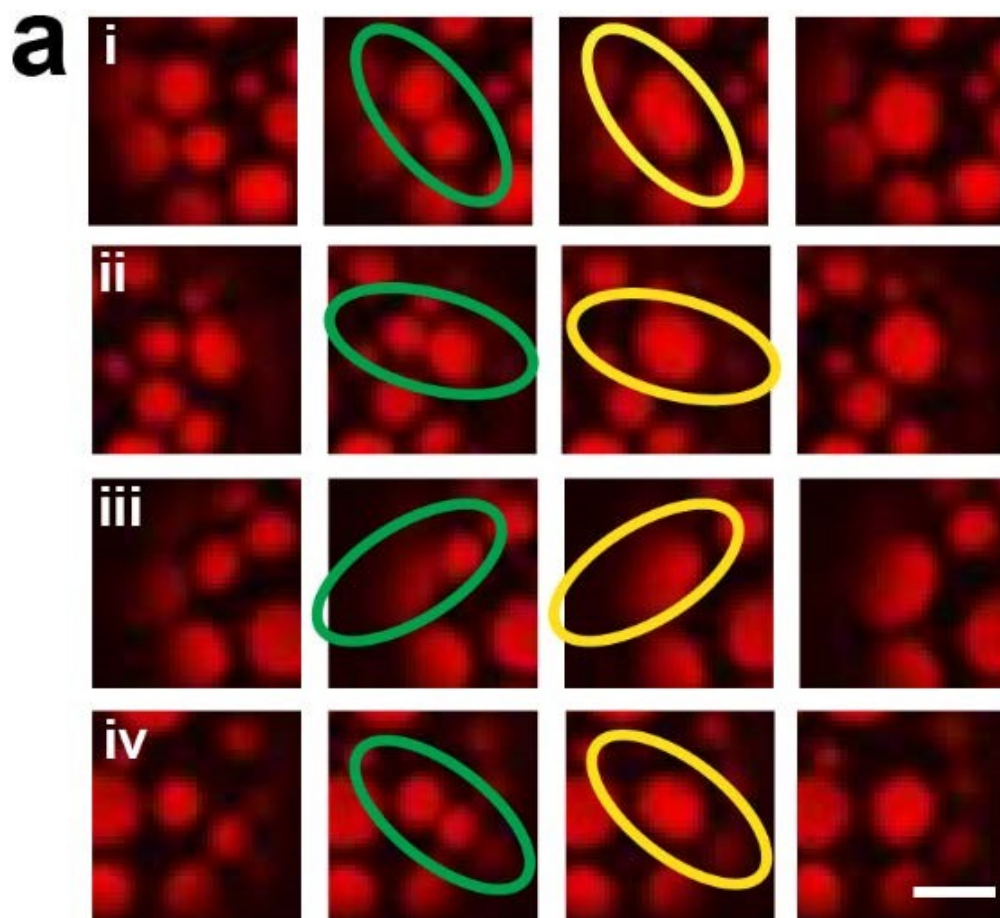

**Fig. S2. Peptide-mediated domain coalescence.** Selected frames from time-lapse fluorescence images of electroformed GUVs consisting of POPC/ Sphingomyelin/ Cholesterol/ Rho-B DOPE (33/33/33/1) upon incubation with 5  $\mu$ M AH peptide (See main narrative for additional details). The sequences, i through iv above, illustrate domain growth through domain-domain coalescence at four different instances in a single experiment. Scale Bar, 5  $\mu$ m.

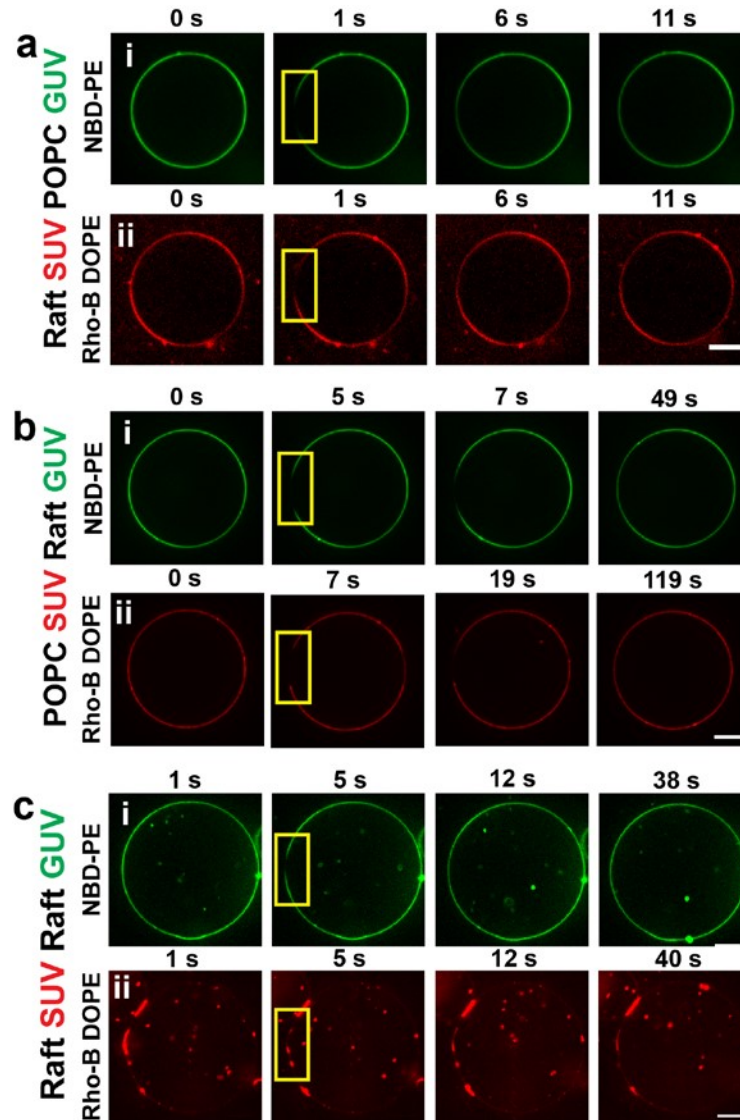

**Fig. S3. Competition Assay FRAP Experiments.** Selected fluorescence images of FRAP experiments using GUVs and SUVs consisting of either raft [POPC/Sphingomyelin/Cholesterol (33/33/33)] or POPC membranes (as indicated) incubated with 1  $\mu$ M AH peptide. The remaining three permutations of vesicle size, GUV or SUV, and composition, Raft or POPC, are tested in addition to previously shown GUV/SUV POPC/POPC (see **Fig. 5**). **a**, GUV/SUV POPC/raft (i) bleach NBD-PE, images taken at 0 s, 1 s, 6 s, 11 s (ii) bleach Rho-B DOPE, images taken at 0 s, 1 s, 6 s, 11 s. **b**, GUV/SUV raft/POPC (i) bleach NBD-PE, images taken at 0 s, 5 s, 7s, 49 s (ii) bleach Rho-B DOPE, images taken at 0 s, 7 s, 19 s, 119 s. **c**, GUV/SUV raft/raft (i) bleach NBD-PE with images taken at 1 s, 5 s, 12 s, 38 s (ii) bleach Rho-B DOPE with images taken at 1 s, 5 s, 12 s, 40 s. Yellow boxes highlight bleached regions. Scale Bars, 10  $\mu$ m.

## SUPPORTING MOVIE LEGENDS

**Movie S1.** A representative example (1 of 2) of time-lapse sequence of fluorescence images, acquired using spinning disk confocal fluorescence microscopy, of electroformed GUVs consisting of **POPC/Sphingomyelin/Cholesterol/Rhodamine-B DOPE (33/33/33/1)** containing 300 mM sucrose inside and 300 mM glucose outside during incubation with **5  $\mu$ M AH Peptide**. Scale bar = 30  $\mu$ M.

**Movie S2.** A representative example (2 of 2) of time-lapse sequence of fluorescence images, acquired using spinning disk confocal fluorescence microscopy, of electroformed GUVs consisting of **POPC/Sphingomyelin/Cholesterol/Rhodamine-B DOPE (33/33/33/1)** containing 300 mM sucrose inside and 300 mM glucose outside during incubation with **5  $\mu$ M AH Peptide**. Scale bar = 30  $\mu$ M.

**Movie S3.** A time-lapse sequence of fluorescence images, acquired using spinning disk confocal fluorescence microscopy, of electroformed GUVs consisting of **POPC/Sphingomyelin/Cholesterol/DP-EG10-Biotin/Rhodamine-B DOPE (32/32/32/3/1)** containing 300 mM sucrose in the vesicle interior and a mixture of 300 mM glucose (92%) and 1X PBS pH 7.2 (8%) in the exterior bath. After incubation with **2  $\mu$ M AH peptide**, vesicles were then incubated with **1  $\mu$ M Oregon Green 488 Neutravidin**, which binds and aids in the visualization of the DP-EG10-Biotin. Scale bar = 20  $\mu$ M.

**Movie S4.** A representative time-lapse sequence of fluorescence images, acquired using spinning disk confocal fluorescence microscopy, of Electroformed GUVs consisting of **POPC/Sphingomyelin/Cholesterol/NBD-PE (33/33/33/1)** containing 300 mM sucrose inside and 300 mM glucose outside. Vesicles were incubated with a mixture of 1.5  $\mu\text{M}$  **5-TAMRA-labeled AH peptide** and 1.5  $\mu\text{M}$  AH peptide (1.5 + 1.5 = **3  $\mu\text{M}$**  total). Scale bar = 30  $\mu\text{M}$ .

**Movie S5.** A typical example (1 of 2) of time-lapse sequence of fluorescence images, acquired using spinning disk confocal fluorescence microscopy, of electroformed GUVs consisting of **POPC/Rhodamine-B DOPE (99/1)** containing 300 mM sucrose inside and 300 mM glucose outside incubated with **14  $\mu\text{M}$  AH peptide**. Scale bar = 20  $\mu\text{M}$ .

**Movie S6.** A typical example (2 of 2) of time-lapse sequence of fluorescence images, acquired using spinning disk confocal fluorescence microscopy, of electroformed GUVs consisting of **POPC/Rhodamine-B DOPE (99/1)** containing 300 mM sucrose inside and 300 mM glucose outside incubated with **14  $\mu\text{M}$  AH peptide**. Scale bar = 20  $\mu\text{M}$ .

**Movie S7.** A time-lapse sequence of fluorescence images, acquired using spinning disk confocal fluorescence microscopy, of electroformed GUVs consisting of **POPC/Rhodamine-B DOPE (99/1)** encapsulating 300 mM sucrose inside and 300 mM glucose outside incubated **with 25  $\mu\text{M}$  5-TAMRA-AH peptide**. Scale bar = 20  $\mu\text{M}$ .

**Movie S8.** A time-lapse sequence of fluorescence images, acquired using spinning disk confocal fluorescence microscopy, of electroformed GUVs consisting of

**POPC/Rhodamine-B DOPE (99/1)** containing 300 mM sucrose inside and 300 mM glucose outside incubated with **35  $\mu$ M 5-TAMRA-AH** peptide. Scale bar = 20  $\mu$ M.

**Movie S9.** A time-lapse sequence of fluorescence images, acquired using spinning disk confocal fluorescence microscopy, of electroformed GUVs consisting of

**POPC/Sphingomyelin/Cholesterol/Rhodamine-B DOPE (33/33/33/1)** containing 300 mM sucrose inside and 300 mM glucose outside incubated with **4  $\mu$ M AH peptide**.

Vesicle exterior contains 40  $\mu$ M **2-NBD-derivatized glucose** (2-NBDG) to monitor any membrane leakage. Scale bar = 30  $\mu$ M.

**Movie S10.** A time-lapse sequence of fluorescence images, acquired using spinning disk confocal fluorescence microscopy, of electroformed GUVs consisting of

**POPC/Rhodamine-B DOPE (99/1)** with 300 mM sucrose inside and 300 mM glucose outside incubated with **10  $\mu$ M AH peptide**. Vesicle exterior contains 28  $\mu$ M

**NBDderivatized glucose** (2-NBDG) to monitor any membrane leakage. Scale bar = 30  $\mu$ M.

**Movie S11. Competition assay** between electroformed GUVs consisting of

**POPC/NBD-PE (99/1)** with 300 mM sucrose inside and 100 nm extruded SUVs consisting of **POPC/Rhodamine-B DOPE (99/1)** with 300 mM sucrose inside monitored using a time-lapse sequence of fluorescence images, acquired using spinning disk confocal fluorescence microscopy. This is a control experiment in which **no AH peptide**

is introduced. Both GUVs and SUVs were osmotically balanced outside with 300 mM glucose. Scale bar = 30  $\mu$ M.

**Movie S12.** A time-lapse sequence of fluorescence images, acquired using spinning disk confocal fluorescence microscopy, of a competition assay between electroformed GUVs consisting of **POPC/NBD-PE (99/1)** with 300 mM sucrose inside and 100 nm extruded SUVs consisting of **POPC/Rhodamine-B DOPE (99/1)** with 300 mM sucrose inside. Prior to incubation with **15  $\mu$ M AH peptide**, GUVs and SUVs were osmotically balanced outside with 300 mM glucose. Scale bar = 30  $\mu$ M.

**Movie S13.** A time-lapse sequence of fluorescence images, acquired using spinning disk confocal fluorescence microscopy, of a competition assay between electroformed GUVs consisting of **POPC/NBD-PE (99/1)** with 300 mM sucrose inside and 100 nm extruded SUVs consisting of **POPC/Rhodamine-B DOPE (99/1)** with 300 mM sucrose inside. Prior to incubation with **500 nM AH peptide**, GUVs and SUVs were osmotically balanced outside with 300 mM glucose. Scale bar = 30  $\mu$ M.

**Movie S14** A time-lapse sequence of fluorescence images, acquired using spinning disk confocal fluorescence microscopy, of a fluorescence recovery after photobleaching (FRAP) experiment of an electroformed GUV consisting of **POPC/NBD-PE (98/2)** with 300 mM sucrose inside and 300 mM glucose outside. This is a control for Movies S15S17 **with no AH peptide and no SUVs added**. Scale bar = 30  $\mu$ M.



**Movie S15.** Fluorescence recovery after photobleaching (FRAP) of electroformed GUVs consisting of POPC/NBD-PE (98/2) with 300 mM sucrose inside and 300 mM glucose outside. This is a control for Movies S16 & S17 with **POPC/Rhodamine-B DOPE (991)** 100 nm extruded SUVs in 300 mM sucrose added but with **no AH peptide**. Scale bar = 30  $\mu$ M.

**Movie S16.** Fluorescence recovery after photobleaching (FRAP) of electroformed GUVs consisting of **POPC/NBD-PE (98/2)** with 300 mM sucrose inside. The GUV exterior contains 100 nm extruded SUVs consisting of **POPC/Rhodamine-B DOPE (99/1)** with 300 mM sucrose inside. Prior to incubation with **2  $\mu$ M AH peptide**, GUVs and SUVs are osmotically balanced outside with 300 mM glucose. (**NBD CHANNEL**) Scale bar = 30  $\mu$ M.

**Movie S17.** Fluorescence recovery after photobleaching (FRAP) of electroformed GUVs consisting of **POPC/NBD-PE (98/2)** with 300 mM sucrose inside. The GUV exterior contains 100 nm extruded SUVs consisting of **POPC/Rhodamine-B DOPE (99/1)** with 300 mM sucrose inside. Prior to incubation with **2  $\mu$ M AH peptide**, GUVs and SUVs are osmotically balanced outside with 300 mM glucose. (**RHODAMINE CHANNEL**)  
Scale bar = 30  $\mu$ M.
